# Supplementary material for: Vaccine candidates derived from a novel infectious cDNA clone of an American genotype dengue virus type 2
Source: Springer Nature journal article supplement (doi:10.1186/1471-2334-4-39), 2004-10-04

**A.**

Subclone fragments:

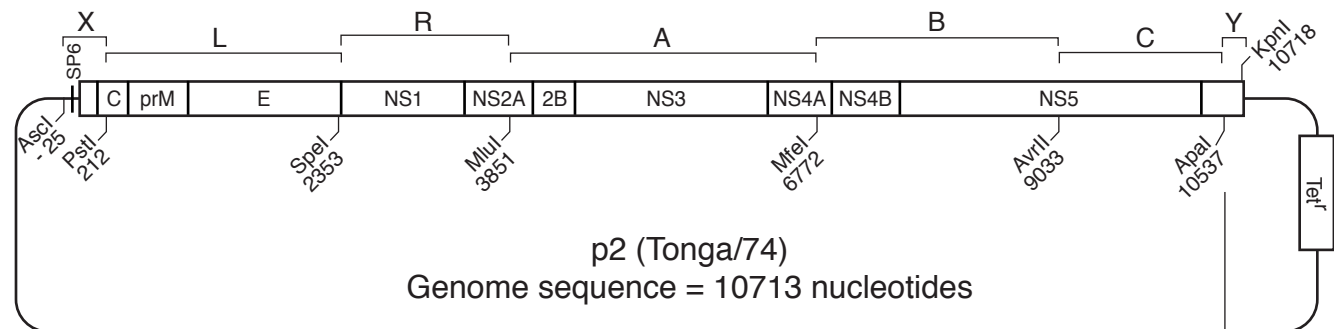

30 nucleotides  
removed to  
create p2 $\square$ 30

**B.**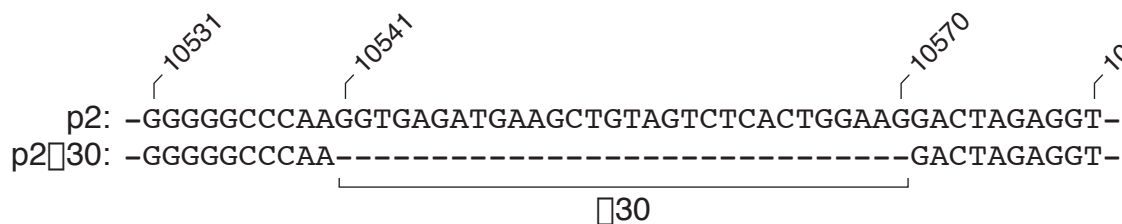

Supplement: 12879_2004_124_MOESM1_ESM.pdf [file 12879_2004_124_MOESM1_ESM.pdf]
